# Supplementary material for: Chasing the open-state structure of pentameric ligand-gated ion channels
Source: PubMed Central journal article supplement — J Gen Physiol. 2017 Dec 4;149(12):1119–38. doi: 10.1085/jgp.201711803 (PMC5715906; doi:10.1085/jgp.201711803), 2017-12-04
Supplement: JGP_201711803_sm.pdf [file JGP_201711803_sm.pdf]

## SUPPLEMENTAL MATERIAL

Gonzalez-Gutierrez et al., <https://doi.org/10.1085/jgp.201711803>

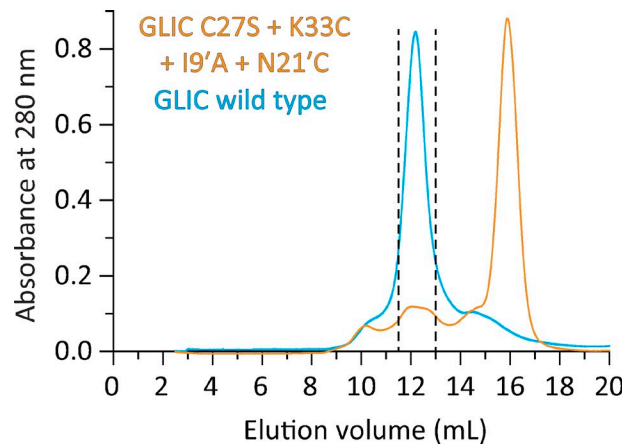

Figure S1. **Decreased pentameric stability of GLIC C27S + K33C + I9'A + N21'C mutant in *n*-dodecyl- $\beta$ -D-maltopyranoside (DDM).** Representative size-exclusion chromatography profiles of WT GLIC and the quadruple mutant; the y-axis is not normalized. The chromatography column was a Superdex 200 10/300 GL (GE Healthcare Life Sciences). The vertical dashed lines indicate the pooled fractions used for x-ray crystallography.

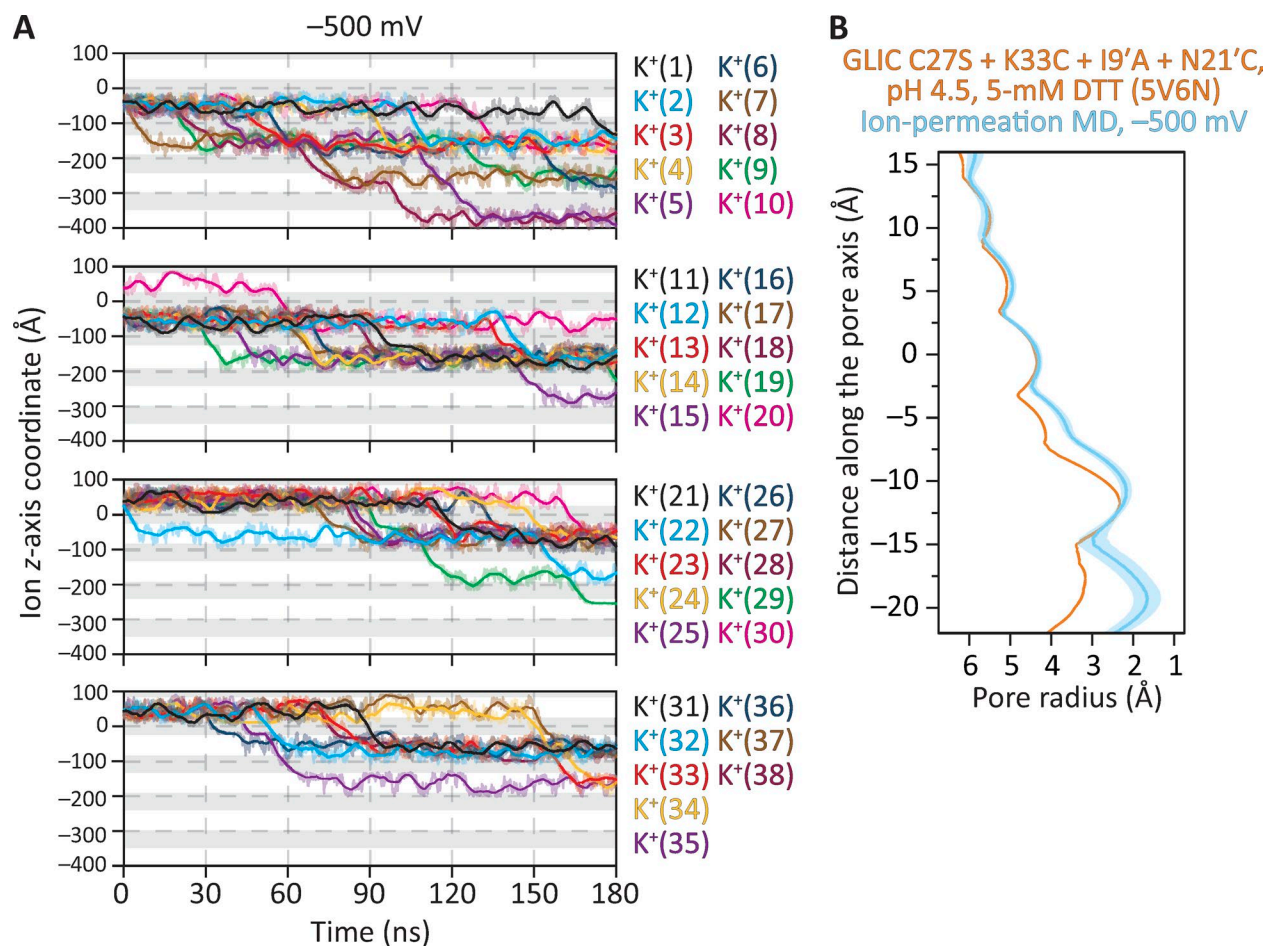

**Figure S2. MD simulation of ion permeation through the structural model of the disulfide-reduced GLIC C27S + K33C + I9'A + N21'C mutant at -500 mV.** The membrane was bathed by symmetrical 150 mM KCl, and the temperature was 37°C. (A) Ion trajectories. For clarity of display, the trajectories of the 38 K<sup>+</sup> that crossed the membrane at least once in the simulated ~180 ns were displayed in four separate panels. Of these 38 K<sup>+</sup>, 27 crossed the membrane inward once, 8 did so twice, and 3 did so three times. Because no Cl<sup>-</sup> crossings were observed during the simulated time, these 52 net K<sup>+</sup> inward crossings represent an inward current of ~-46 pA. Only the trajectories of ions that crossed the membrane are plotted. The gray areas indicate the regions occupied by the membrane in the periodic-simulation system, and downward transitions of the ion trajectories through these regions represent inward crossings. The darker lines are running averages of the data, which are displayed in a lighter shade. The length of the simulation box along the z-axis was 108 Å. (B) Pore-radius profiles (estimated using HOLE [Smart et al., 1996]) of structural models of the disulfide-reduced quadruple mutant. The profile of the crystal-structure model (PDB ID code 5V6N; this work) is compared with that computed during the ion-permeation MD simulation illustrated in A. The latter is the mean profile—displayed as the mean (darker lines) ± 1 SD (lighter shade)—calculated from the different frames of the simulation; the vertical axis extends, approximately, between M2 positions -3' (bottom) and 21' (top). Side-chain rotamers were optimized using SCWRL4 (Krivov et al., 2009) before the ion-permeation simulation was run.

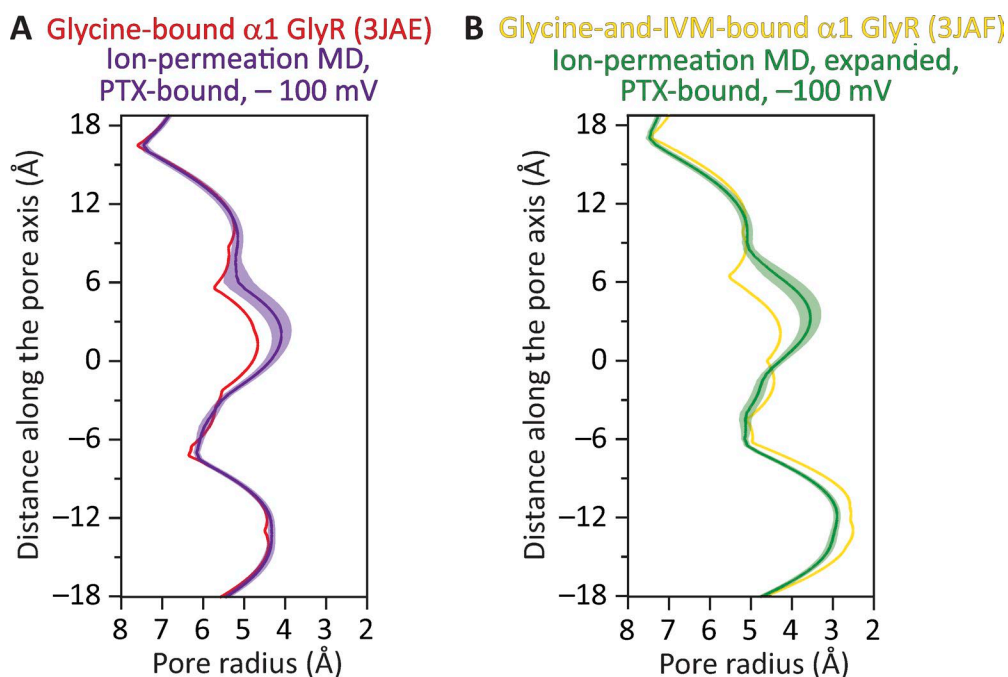

Figure S3. **Pore-radius profiles of picrotoxin-bound models of the  $\alpha 1$  GlyR.** (A) The profile of the cryo-EM-structure model of the glycine-bound GlyR (PDB ID code 3JAE) is compared with that computed during the MD simulation of ion permeation through the 3JAE model with a molecule of picrotoxin placed in the pore (see Fig. 9, D and E). PTX, picrotoxin. (B) The profile of the cryo-EM-structure model of the glycine-and-ivermectin-bound GlyR (PDB ID code 3JAF) is compared with that computed during the MD simulation of ion permeation through the expanded 3JAF model with a molecule of picrotoxin placed in the pore (see Fig. 10 E). IVM, ivermectin. In A and B, ion-permeation-MD pore-radius profiles are mean profiles—displayed as the mean (darker lines)  $\pm 1$  SD (lighter shade)—calculated from the different frames of each simulation upon removing the modeled molecule of picrotoxin; the vertical axes extend, approximately, between M2 positions  $-3'$  (bottom) and  $21'$  (top). Side-chain rotamers were optimized using SCWRL4 (Krivov et al., 2009) before the ion-permeation simulations were run.

Table S1. Data collection and refinement statistics

| Parameter                       | GLIC E-2'I + I9'A pH 4.5 | GLIC C27S + K33C + I9'A + N21'C pH 4.5, 5 mM DTT |
|---------------------------------|--------------------------|--------------------------------------------------|
| <b>Data collection</b>          |                          |                                                  |
| Wavelength, Å                   | 0.97857                  | 0.97857                                          |
| Space group                     | C2                       | C2                                               |
| <b>Cell dimensions</b>          |                          |                                                  |
| a, b, c, Å                      | 180.99, 134.28, 159.94   | 177.18, 134.06, 159.68                           |
| $\alpha, \beta, \gamma, ^\circ$ | 90, 102.06, 90           | 90, 101.13, 90                                   |
| Resolution, Å                   | 105.98–3.12              | 106.16–3.36                                      |
| R <sub>sym</sub>                | 0.162 (1.090)            | 0.244 (1.433)                                    |
| R <sub>meas</sub>               | 0.192 (1.300)            | 0.262 (1.535)                                    |
| R <sub>pim</sub>                | 0.089 (0.602)            | 0.095 (0.549)                                    |
| CC1/2                           | 0.995 (0.764)            | 0.979 (0.743)                                    |
| I/ $\sigma$ (I)                 | 8.69 (1.3)               | 9.6 (1.9)                                        |
| Completeness, %                 | 99.9 (99.5)              | 99.9 (100.0)                                     |
| Multiplicity                    | 4.2 (4.3)                | 7.7 (7.8)                                        |
| <b>Refinement</b>               |                          |                                                  |
| Resolution, Å                   | 70.44–3.12 (3.23–3.12)   | 59.76–3.36 (3.47–3.36)                           |
| No. unique reflections          | 65,330 (6,485)           | 52,507 (5,228)                                   |
| R <sub>work</sub>               | 0.240                    | 0.231                                            |
| R <sub>free</sub>               | 0.279                    | 0.284                                            |
| <b>RMSD values</b>              |                          |                                                  |
| Bond lengths, Å                 | 0.011                    | 0.012                                            |
| Bond angles, °                  | 1.55                     | 1.63                                             |
| <b>No. atoms</b>                |                          |                                                  |
| Protein                         | 12,583                   | 12,560                                           |
| Ligand/ions                     | 128                      | 86                                               |
| <b>B-factors, Å<sup>2</sup></b> |                          |                                                  |
| Protein/ligand/ions             | 67.4                     | 67.7                                             |
| <b>Ramachandran plot</b>        |                          |                                                  |
| Favored, %                      | 98.0                     | 96.0                                             |
| Allowed, %                      | 1.9                      | 3.0                                              |
| MolProbity score                | 1.87                     | 2.26                                             |
| <b>PDB ID code</b>              | 5V6O                     | 5V6N                                             |

Highest-resolution shell values are shown in parentheses.

## REFERENCES

- Krivov, G.G., M.V. Shapovalov, and R.L. Dunbrack Jr. 2009. Improved prediction of protein side-chain conformations with SCWRL4. *Proteins*. 77:778–795. <https://doi.org/10.1002/prot.22488>
- Smart, O.S., J.G. Neduveilil, X. Wang, B.A. Wallace, and M.S. Sansom. 1996. HOLE: a program for the analysis of the pore dimensions of ion channel structural models. *J. Mol. Graph.* 14:354–360, 376. [https://doi.org/10.1016/S0263-7855\(97\)00009-X](https://doi.org/10.1016/S0263-7855(97)00009-X)
